# Supplementary material for: Exploring the Lived Experiences of Individuals with Cystic Fibrosis After the Implementation of Trikafta® for Treatment.
Source: Research Square preprint supplement (doi:10.21203/rs.3.rs-7989348/v1), 2025-12-03
Supplement: Supplementary file 1 [file 11a961cfedecfa233d5e67d2.docx]

*Semi-structured interview guide*

| **Introduction** |
| --- |
| Tell me a little bit about yourself. |
| How long have you been coming to UH for care? |
| How far away do you live from the clinic? Have you always lived in Ohio? |
| How long have you been on Trikafta? |
| Have you been on any other CFTR modulators before Trikafta? |
| **Physical Health** |
| How is your physical health since starting Trikafta? |
| ***Probes***Have you experienced any increase or decrease in lung symptoms? (coughing, trouble breathing, increased mucus, etc.)  What changes have you noticed? |
| How was your health before you started taking Trikafta? |
| What are the biggest changes that you have seen in your health after starting Trikafta? |
| ***Probes (if negative change in health)*** What do you think your change in health might be caused by? |
| **Mental Health** |
| How has your mental health been since starting Trikafta? Have you noticed any changes? |
| ***Probe (if mental health has changed)*** How has your life been impacted by your change in mental health? Have you noticed any positive changes in your mental health? Have you noticed any negative changes in your mental health? What do you think your change in mental health might be caused by? |
| **Day-to-day Living** |
| Tell me a little bit about your day-to-day life outside of managing your CF. |
| Has your day-to-day life been impacted by CF? |
| Has your day-to-day life changed since starting Trikafta? |
| ***Probes*** Do you feel like you have been able to partake in any new hobbies? How much of your day was focused on treatment regimens before Trikafta? Has this changed since starting Trikafta? Walk me through what a typical day was like for you before and after starting Trikafta. |
| **Career** |
| Are you able to work or attend school? |
| ***Yes*** Tell me a little more about [school, job] |
| Has having CF shaped how you make choices on jobs, school, or future career path? |
| ***Yes***  In what ways, both negative and positive, has CF impacted these choices?  Some people have noticed…. [missing days of work, choosing less labor-intensive jobs, pursue less schooling]. Have you noticed that at all? |
| Has your choices on jobs, school, or future career paths changed since starting Trikafta? |
| ***Yes*** Some people have noticed… [being able to work more, less absences, changing career paths, pursing more schooling]. Have you noticed that at all?  Have you considered pursuing any other careers? |
| **Relationships** |
| Are you currently in a relationship? |
| ***Yes*** How long have you been with your partner? Are you married? Have you ever been married?  Has CF impacted your relationship at all?  Has starting Trikafta impacted your relationship?  ***No***  Has CF impacted your ability or desire to be in a relationship?  Has Trikafta impacted your ability or desire to be in a relationship? |
| **Family** |
| Tell me a little bit about your family. |
| ***Probes*** Do you have any siblings?  Are you close with your parents? Is there anyone else in your family with CF? |
| Has CF affected your relationship with your family at all? |
| Has your relationship with your family changed after starting modulators? |
| **Children** |
| Do you have any children? |
| ***Yes*** How many kids do you have? How old are they? How has CF impacted your process of having a family?  Did you conceive your children naturally?  ***Yes- participant had a pregnancy***  How was your pregnancy experience?  Did you receive any additional care for your CF?  Did you have your children before you started on Trikafta? Were you on any other modulators at the time? |
| What part has CF played in your thoughts/decisions on having children? |
| Has being on modulators changed the way you think about family planning? |
| **Financial Planning** |
| Has CF impacted your finances or plans for the future? |
| ***Yes*** Some people have thought about…[saving for a family, retirement, etc.] while other people haven’t, where do you fall in this? |
| Has your future planning or vision for your future changed after starting Trikafta? If yes, how so? |
| **Care Teams** |
| Can you tell me about your relationship with your CF healthcare team? |
| Have your relationships with your healthcare team been impacted after starting Trikafta? |
| ***Probes*** Before Trikafta did you have a close relationship with your care team? Do you feel as though these relationships have gotten stronger, weaker, or stayed the same over time? |
| **Needs/Resources** |
| Thinking back on all these areas of your life that we have talked about, have you experienced any new needs or struggles after starting CFTR modulators? |
| ***Yes*** Some people have expressed…[having to change doses of Trikafta, having side effects, having difficulty paying for Trikafta]. Have you experienced any of those?  What resources, if any, have you used to address those needs?  Have you had any trouble finding resources for your needs? |
| **Self-identity** |
| Has having CF impacted your sense of self? |
| Has this changed after starting modulators? |
| **Other** |
| When you think about some of your biggest hopes and worries, what are they? |
| Is this different from what you were concerned with before starting Trikafta? |
| Is there anything that I should have asked you that I didn’t ask about? |
| Is there anything that you would like to ask me? |
| Have you participated in any studies similar to this one before Trikafta was approved. A study was conducted in 2018 by Annelise Page who looked at the lived experiences of individuals with CF who were on Orkambi and Symdeko. |
| ***Yes*** Do you feel like there have been any changes between your lived experience then and now? |
| **Demographics** |
| What race and ethnicity do you identify as? |
| What is your gender identity? |
| **Thank you for taking the time to allow me to interview you today. If you have any more questions don’t hesitate to reach out.**  **If we publish, would you like a copy?** |
